# Supplementary material
Source: bioRxiv or medRxiv preprint supplement (https://www.biorxiv.org/highwire/filestream/121438/field_highwire_adjunct_files/2/401372-3.pdf)

Supplemental Figure 3)

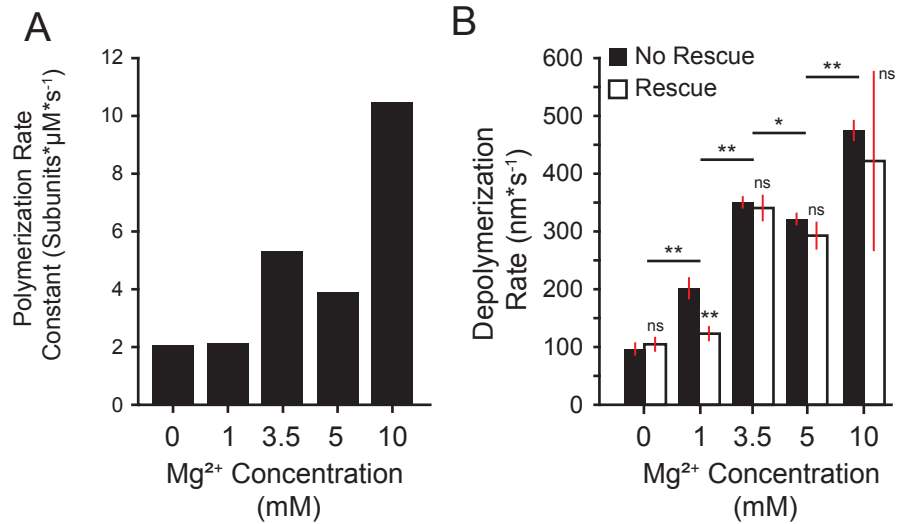

Supplement: Supplementary file [file 401372-3.pdf]
